# Supplementary material for: Group X secreted phospholipase A2 induces lipid droplet formation and prolongs breast cancer cell survival
Source: PubMed Central journal article supplement (PMC3852912; doi:10.1186/1476-4598-12-111), 2013-09-27
Supplement: 1476-4598-12-111-S1.pdf [file 1476-4598-12-111-S1.pdf]

A

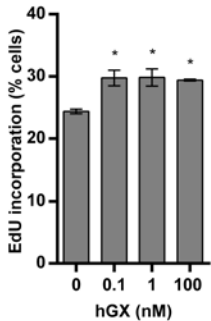

B

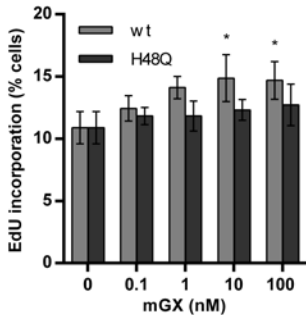

C

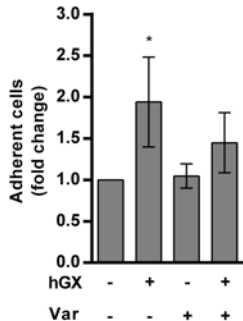

Fig. S1
